# Supplementary material for: Effects of Ti-doping amount and annealing temperature on electrochromic performance of sol–gel derived WO3
Source: Royal Society of Chemistry journal article supplement (doi:10.1039/d2ra02247h), 2022-01-01
Supplement: d2ra02247h1.pdf [file d2ra02247h1.pdf]

## Supporting information

For

### Effects of Ti-doping amount and annealing temperature on electrochromic performance of sol-gel derived WO<sub>3</sub>

Hee sung Park<sup>ab</sup>, Sunghyeok Park<sup>ac</sup>, Seung Han Song<sup>ab</sup>, Dao Thi Thuy<sup>ac</sup>, Hung Van Tran<sup>ac</sup>,  
Seok In Lee<sup>ad</sup>, Churl Hee Cho<sup>\*b</sup>, Chi-Hwan Han<sup>\*a</sup> and Sungjun Hong<sup>\*a</sup>

*<sup>a</sup> Photovoltaic Laboratory, New and Renewable Energy Research, Korea Institute of Energy Research, 152 Gajeong-ro, Yuseong-gu, Daejeon 34125, Republic of Korea.*

*<sup>b</sup> Department of Energy Science and Technology, Chungnam National University, 99 Daehak-ro, Yuseong-gu, Daejeon 35015, Republic of Korea*

*<sup>c</sup> Renewable Energy Engineering, University of Science and Technology, 217, Gajeoung-ro, Yuseong-gu, Daejeon 34113, Republic of Korea.*

*<sup>d</sup> Department of Chemistry, Korea University, Seoul 02741, Republic of Korea*

\*Corresponding author (C-H Cho., C.-H. Han., S-J Hong.)

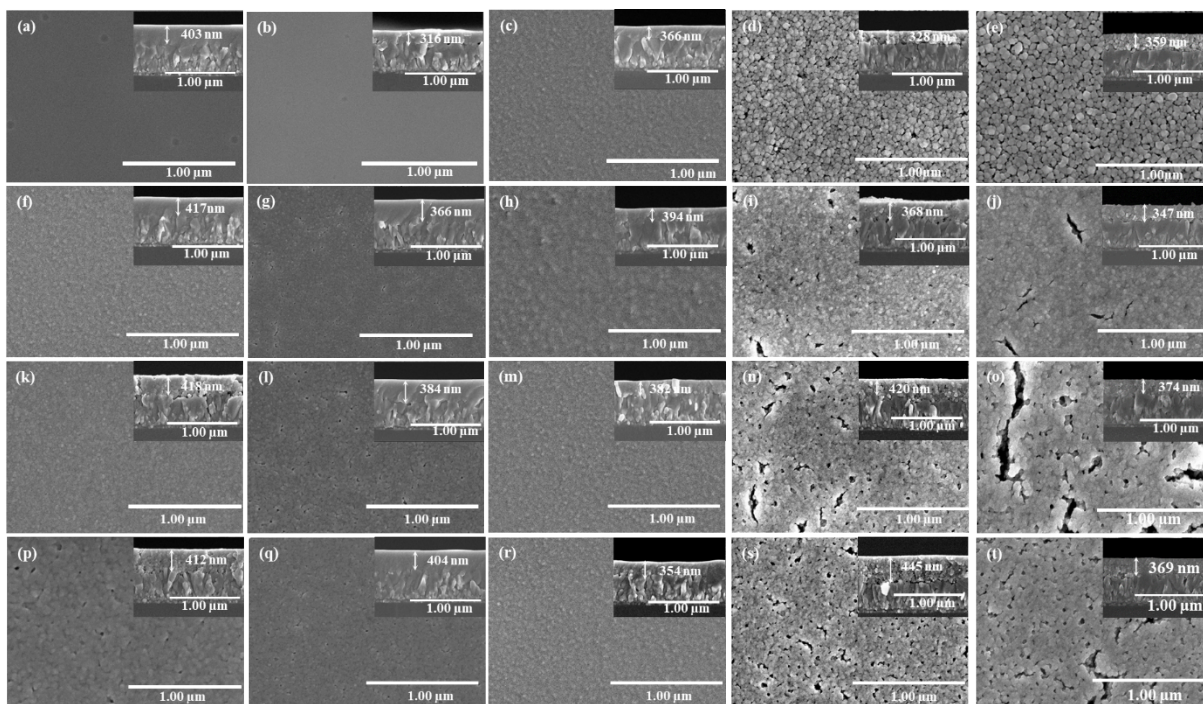

**Figure S1.** SEM surface and cross-sectional images of (1<sup>st</sup> row) 4Ti-WO<sub>3</sub>, (2<sup>nd</sup> row) 12Ti-WO<sub>3</sub>, (3<sup>rd</sup> row) 16Ti-WO<sub>3</sub> and (4<sup>th</sup> row) 20Ti-WO<sub>3</sub> films annealed at 200, 250, 300, 350 and 400 °C from left to right, respectively.

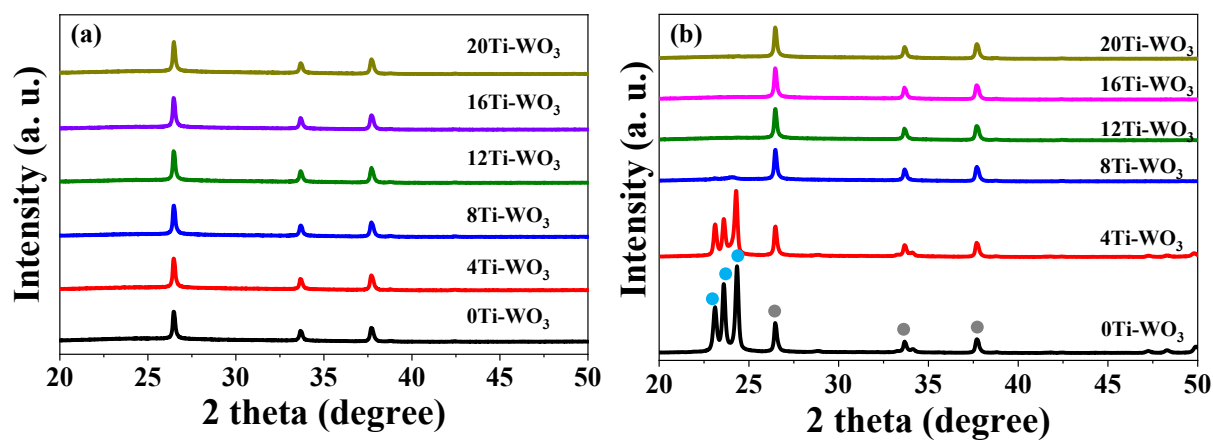

**Figure S2.** XRD patterns of neat and respective TCA doped WO<sub>3</sub> films annealed at (a) 250 and (b) 350 °C. (The light blue and grey circles refer to monoclinic WO<sub>3</sub> and FTO substrate, respectively.)

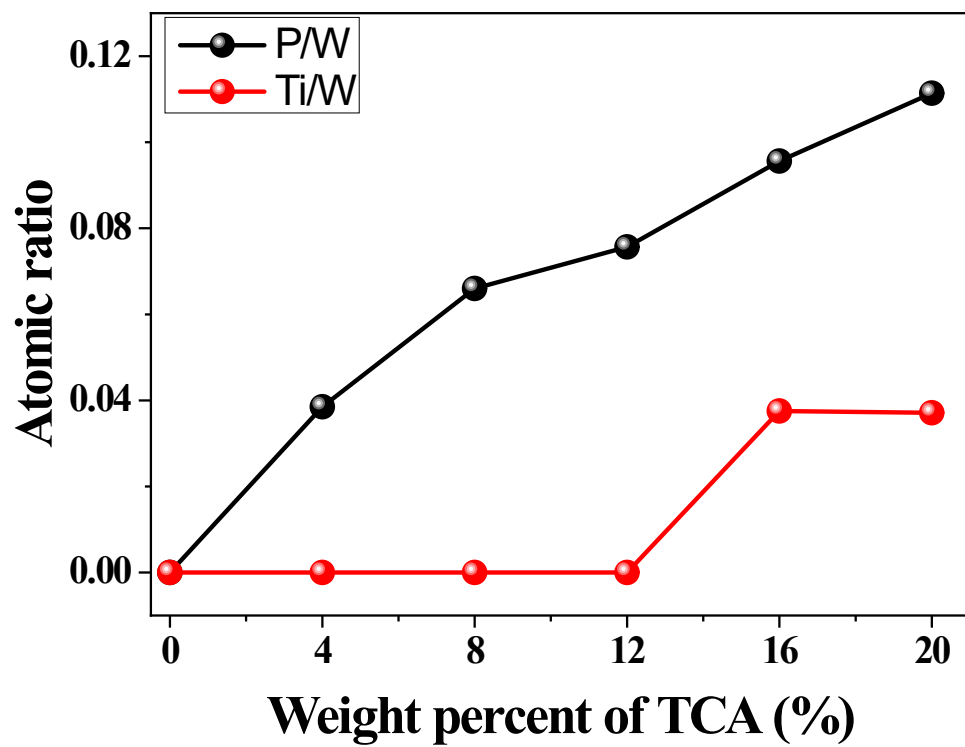

**Figure S3.** Atomic ratios of P/W or Ti/W for  $x\text{Ti-WO}_3\text{-300}$  samples determined with EDS.

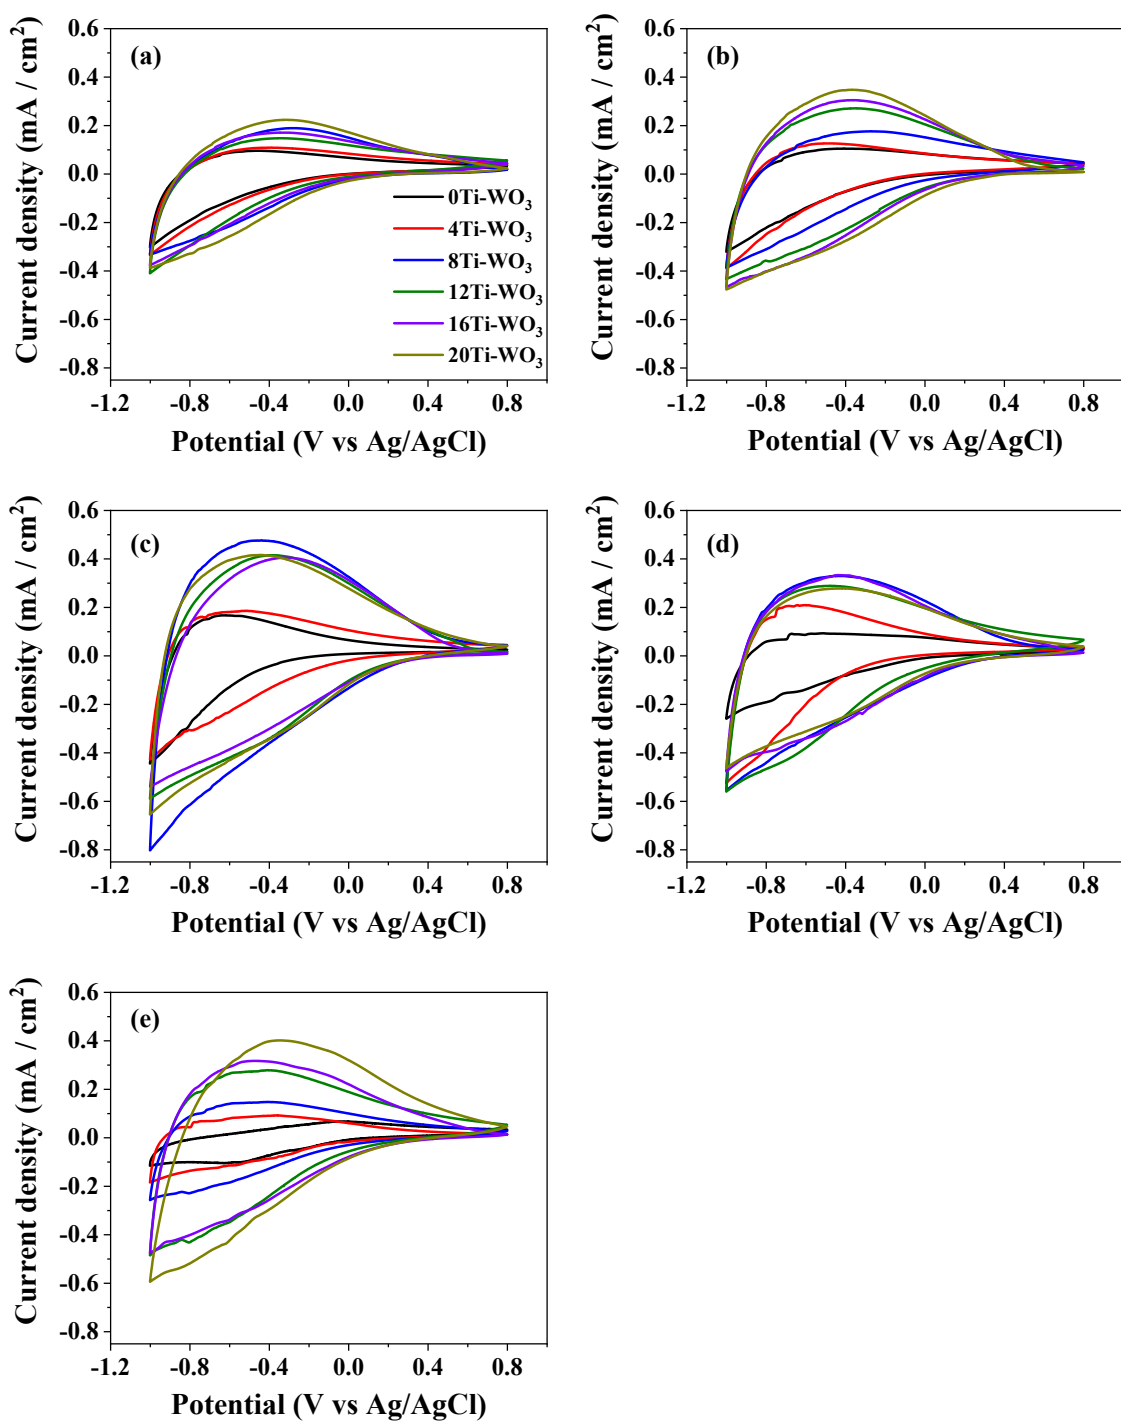

**Figure S4.** Cyclic voltammograms of various WO<sub>3</sub> films annealed at (a) 200, (b) 250, (c) 300, (d) 350, and (e) 400 °C, respectively.

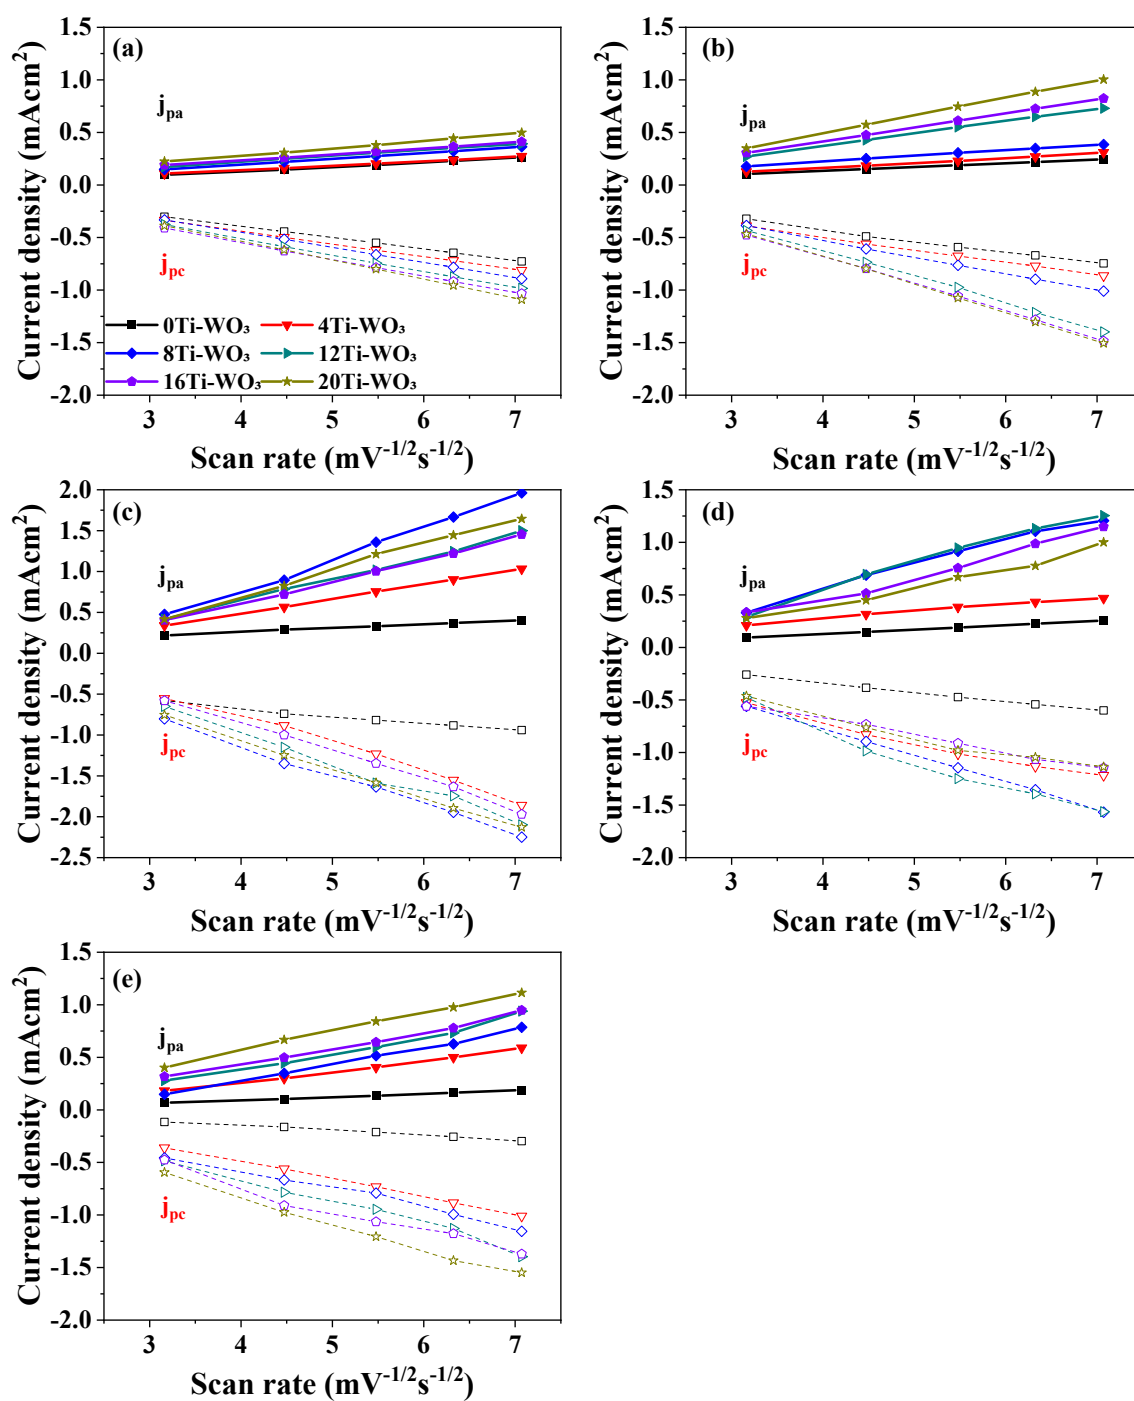

**Figure S5.** Calculations of diffusion coefficients of various WO<sub>3</sub> films annealed at (a) 200, (b) 250, (c) 300, (d) 350, and (e) 400 °C, respectively.

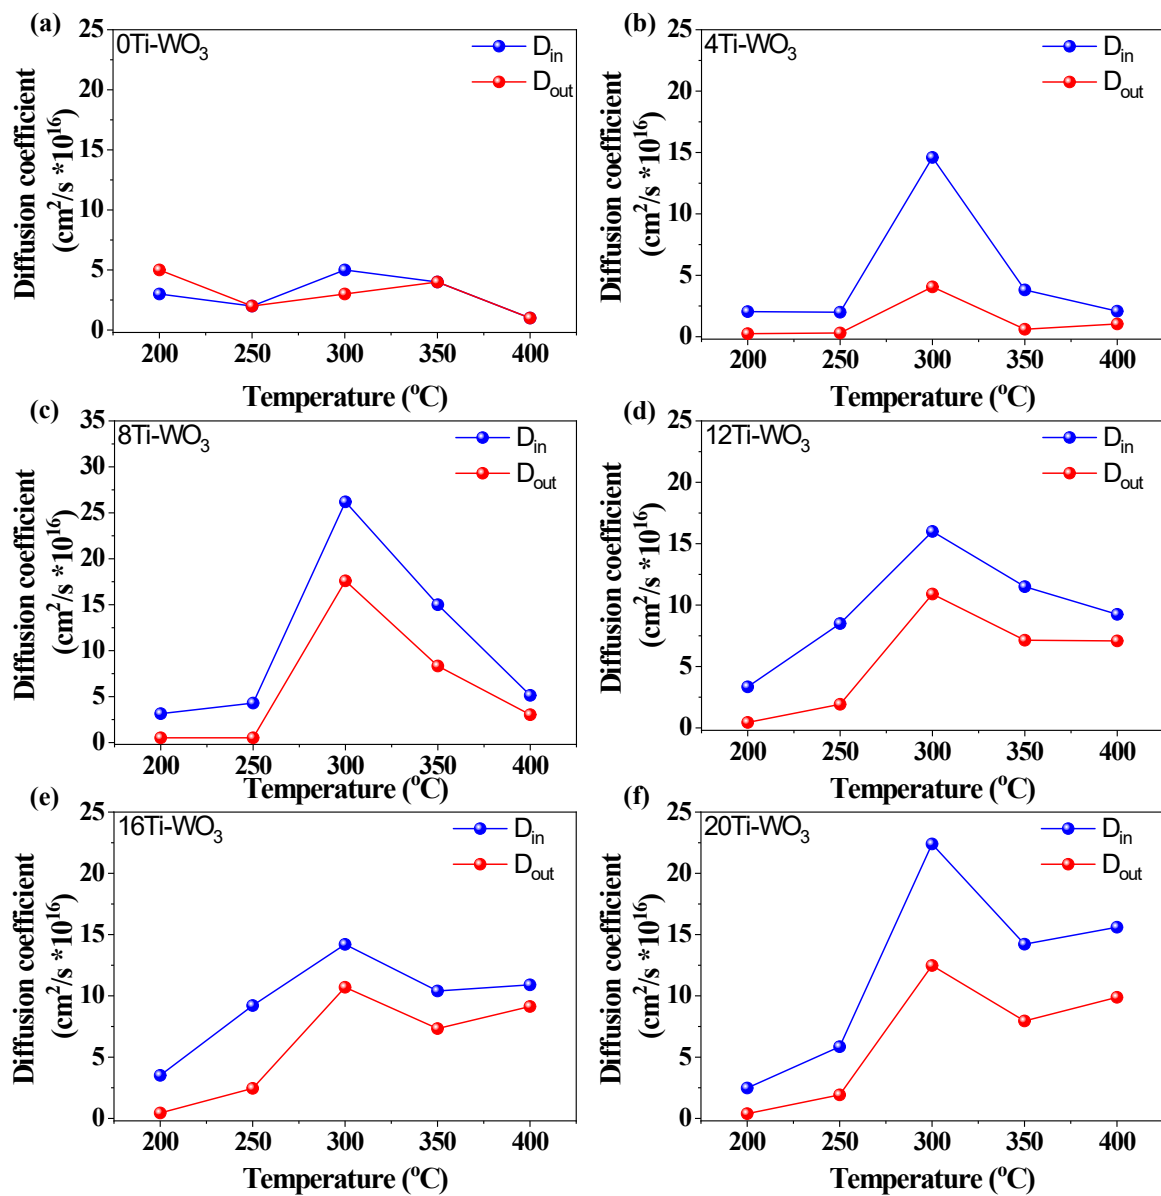

**Figure S6.** Calculated diffusion coefficients of (a) 0Ti-WO<sub>3</sub>, (b) 4Ti-WO<sub>3</sub>, (c) 8Ti-WO<sub>3</sub>, (d) 12Ti-WO<sub>3</sub>, (e) 16Ti-WO<sub>3</sub>, and (f) 20Ti-WO<sub>3</sub> at various annealing temperatures.

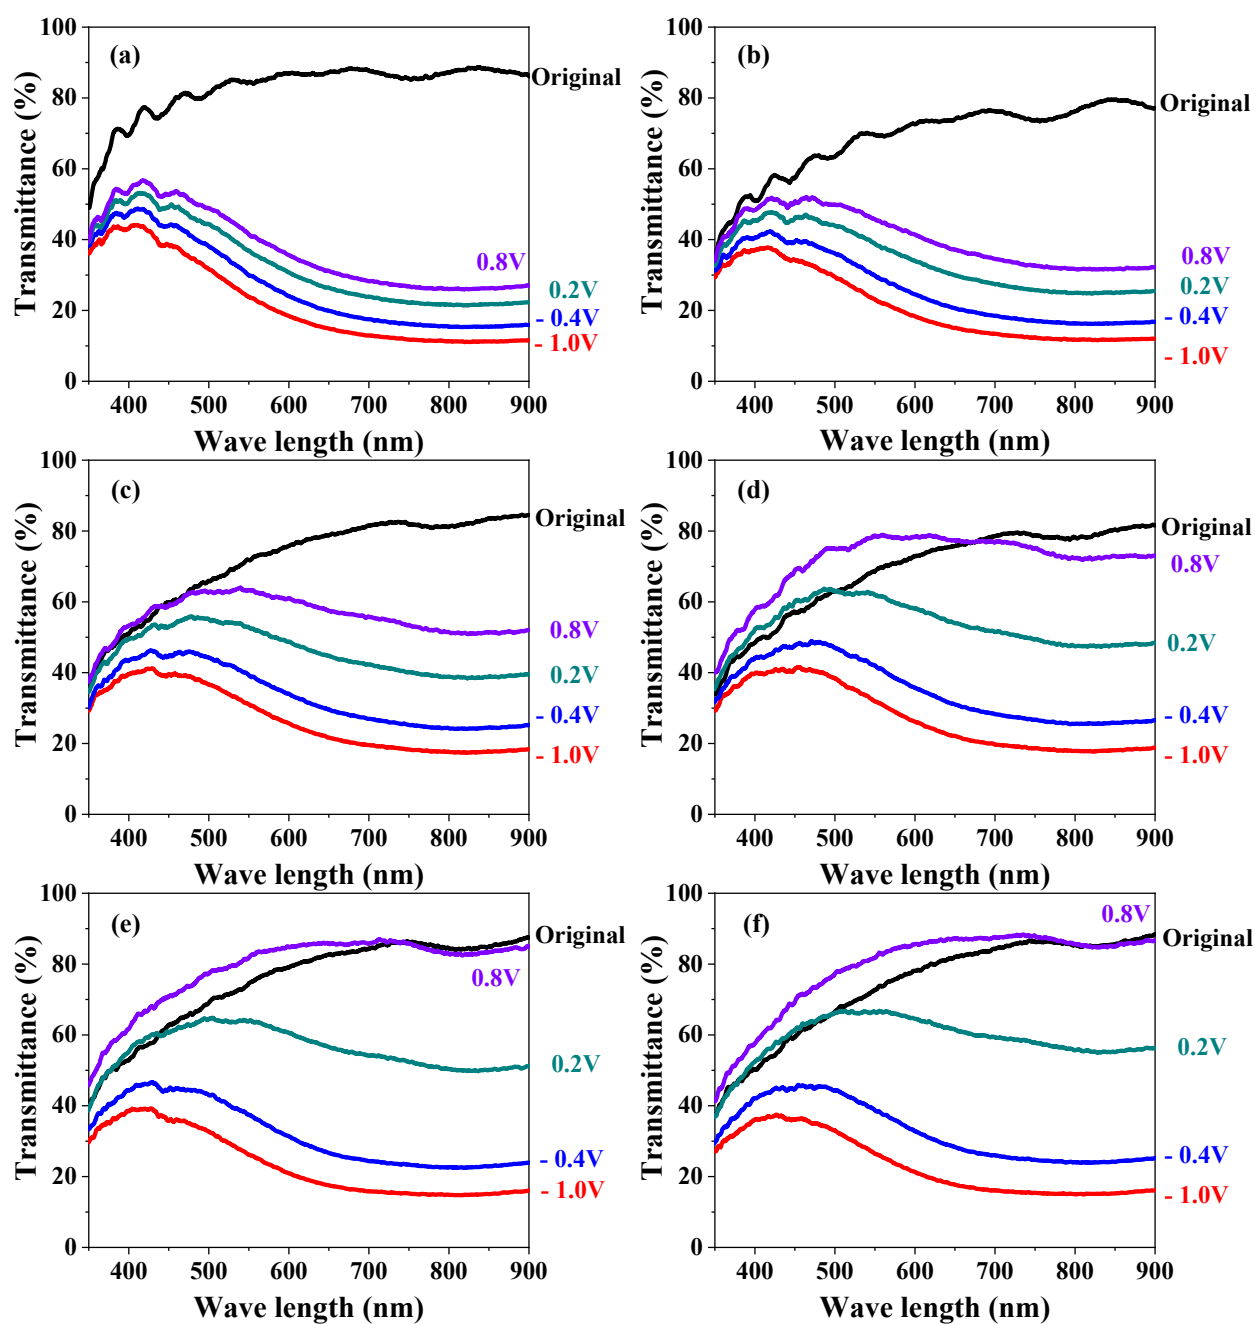

**Figure S7.** In-situ UV-Visible transmittance variations for (a) 0Ti-WO<sub>3</sub>-200, (b) 4Ti-WO<sub>3</sub>-200, (c) 8Ti-WO<sub>3</sub>-200, (d) 12Ti-WO<sub>3</sub>-200, (e) 16Ti-WO<sub>3</sub>-200, and (f) 20Ti-WO<sub>3</sub>-200, respectively.

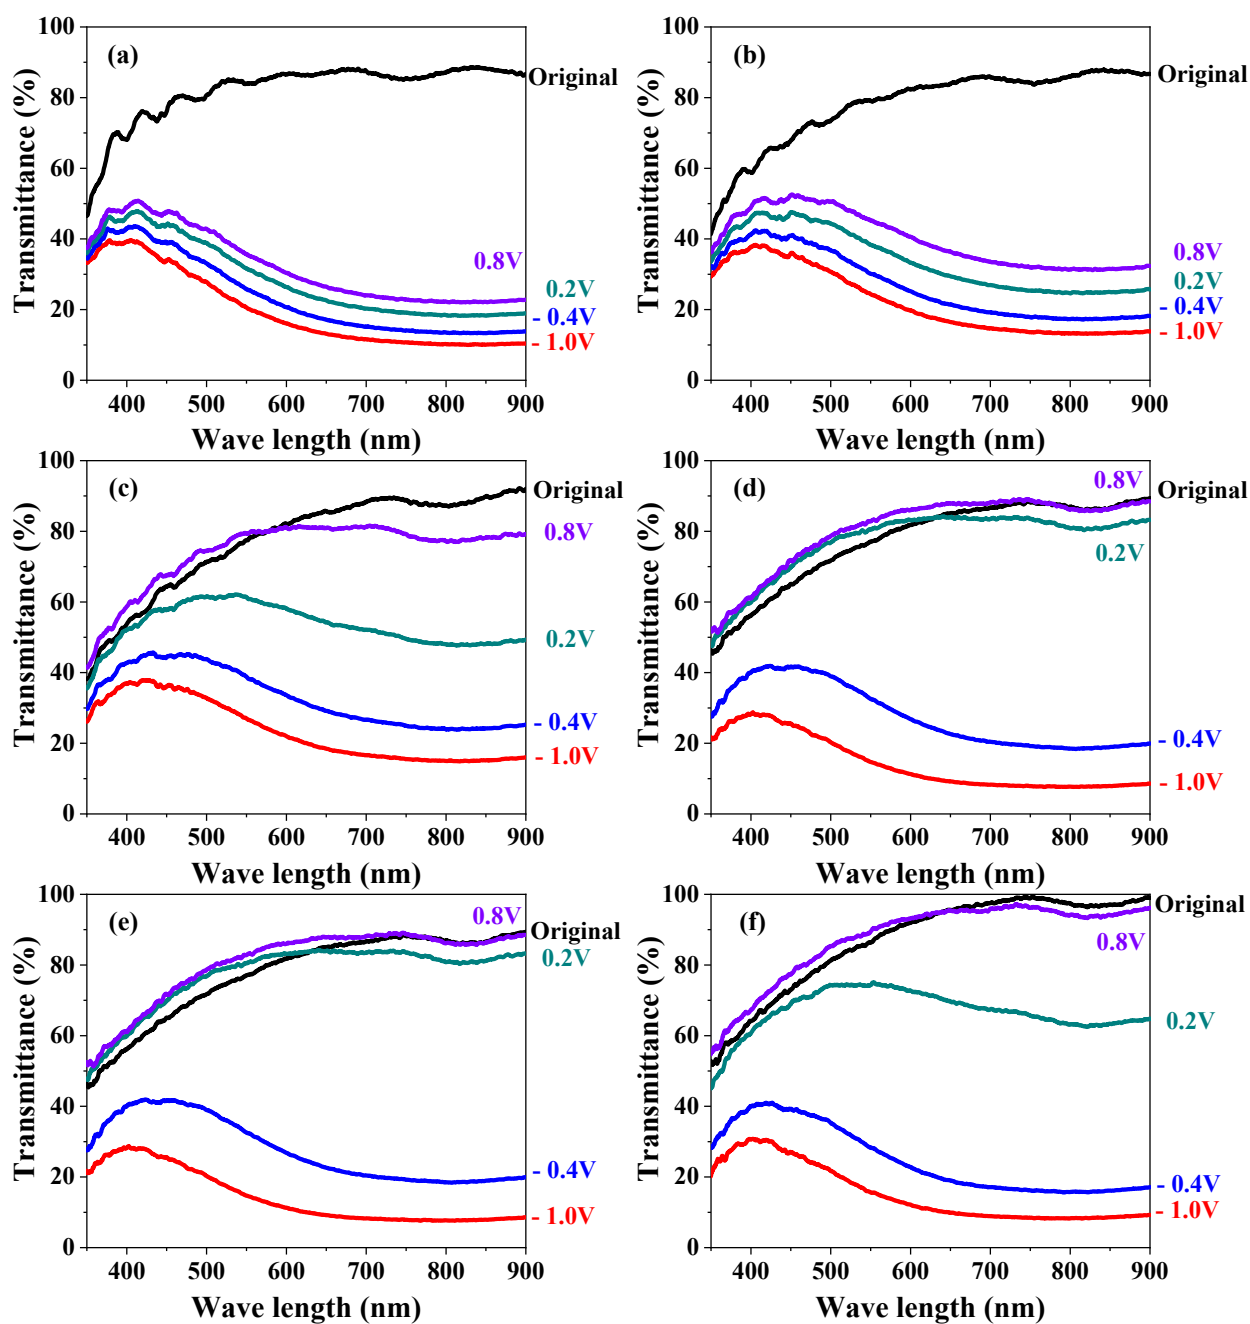

**Figure S8.** In-situ UV-Visible transmittance variations for (a) 0Ti-WO<sub>3</sub>-250, (b) 4Ti-WO<sub>3</sub>-250, (c) 8Ti-WO<sub>3</sub>-250, (d) 12Ti-WO<sub>3</sub>-250, (e) 16Ti-WO<sub>3</sub>-250, and (f) 20Ti-WO<sub>3</sub>-250, respectively.



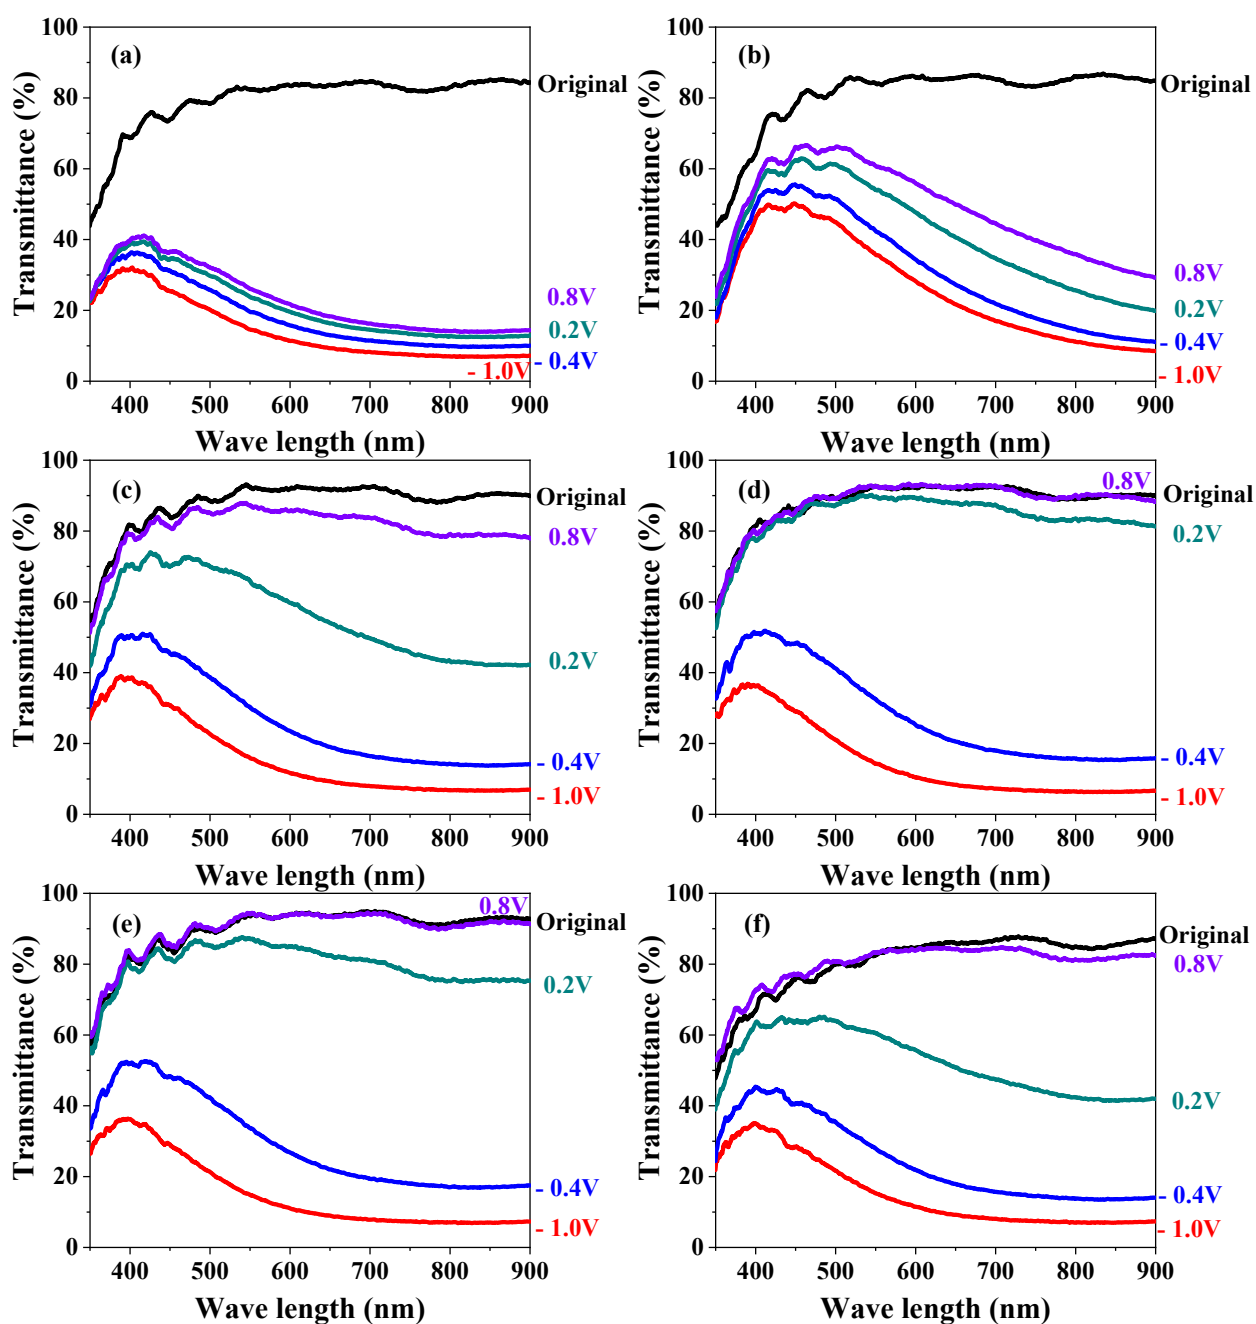

**Figure S9.** In-situ UV-Visible transmittance variations for (a) 0Ti-WO<sub>3</sub>-350, (b) 4Ti-WO<sub>3</sub>-350, (c) 8Ti-WO<sub>3</sub>-350, (d) 12Ti-WO<sub>3</sub>-350, (e) 16Ti-WO<sub>3</sub>-350, and (f) 20Ti-WO<sub>3</sub>-350, respectively.

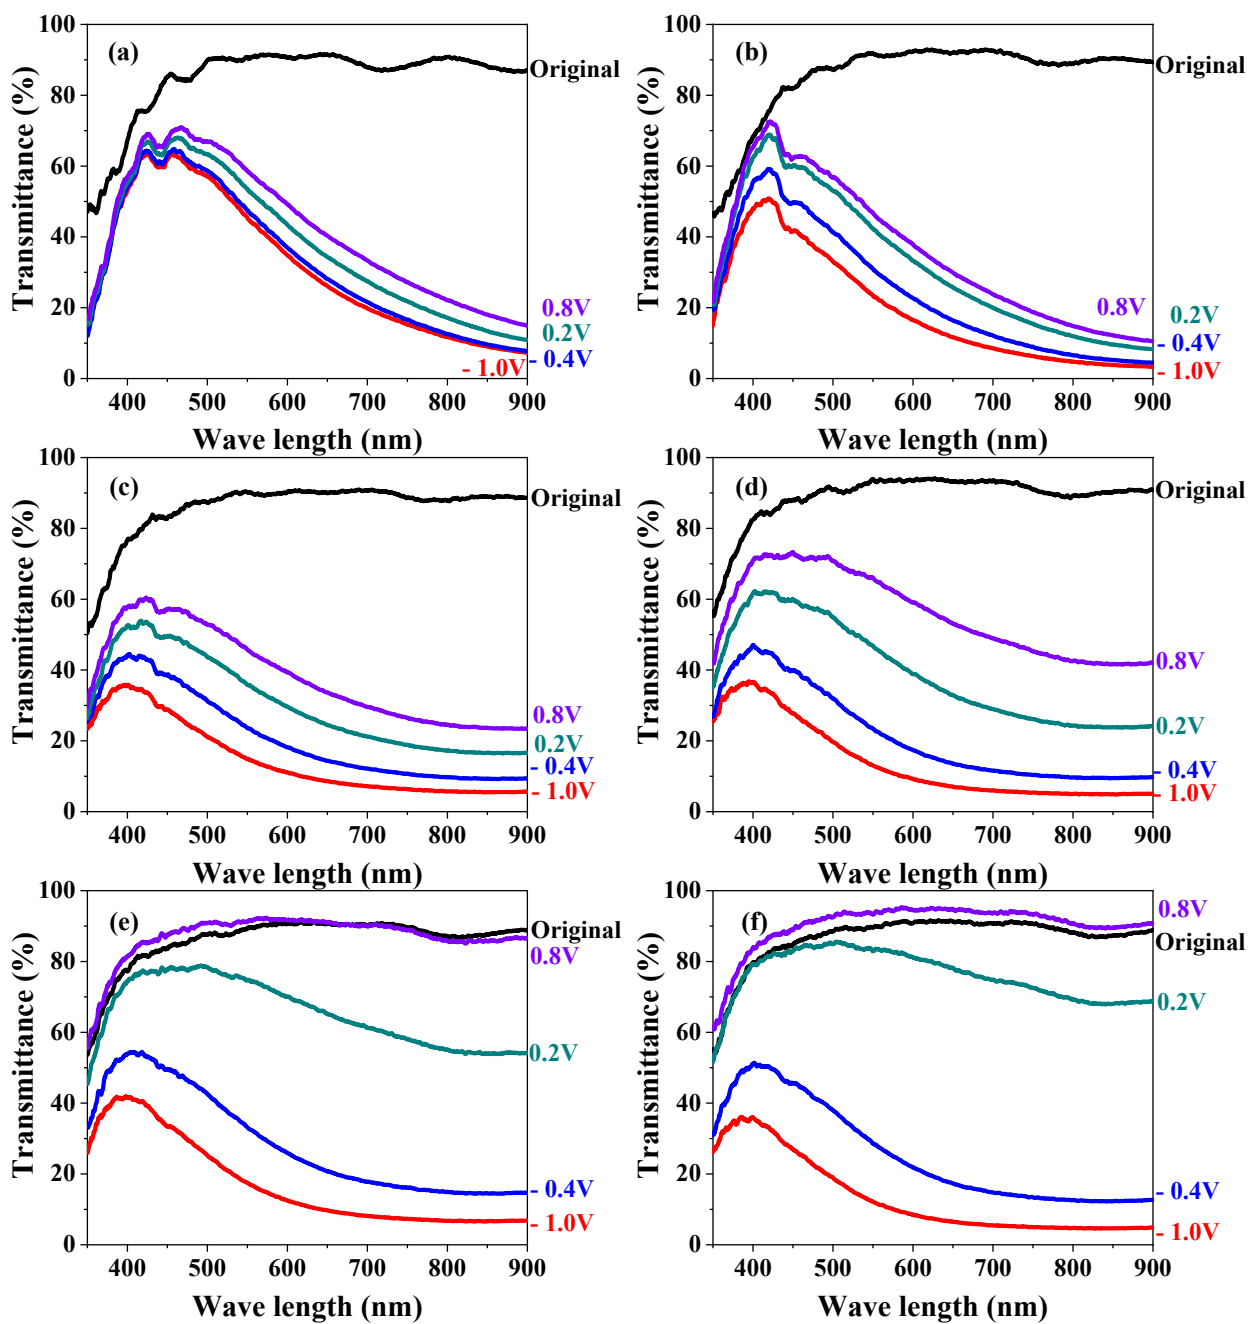

**Figure S10.** In-situ UV-Visible transmittance variations for (a) 0Ti-WO<sub>3</sub>-400, (b) 4Ti-WO<sub>3</sub>-400, (c) 8Ti-WO<sub>3</sub>-400, (d) 12Ti-WO<sub>3</sub>-400, (e) 16Ti-WO<sub>3</sub>-400, and (f) 20Ti-WO<sub>3</sub>-400, respectively.

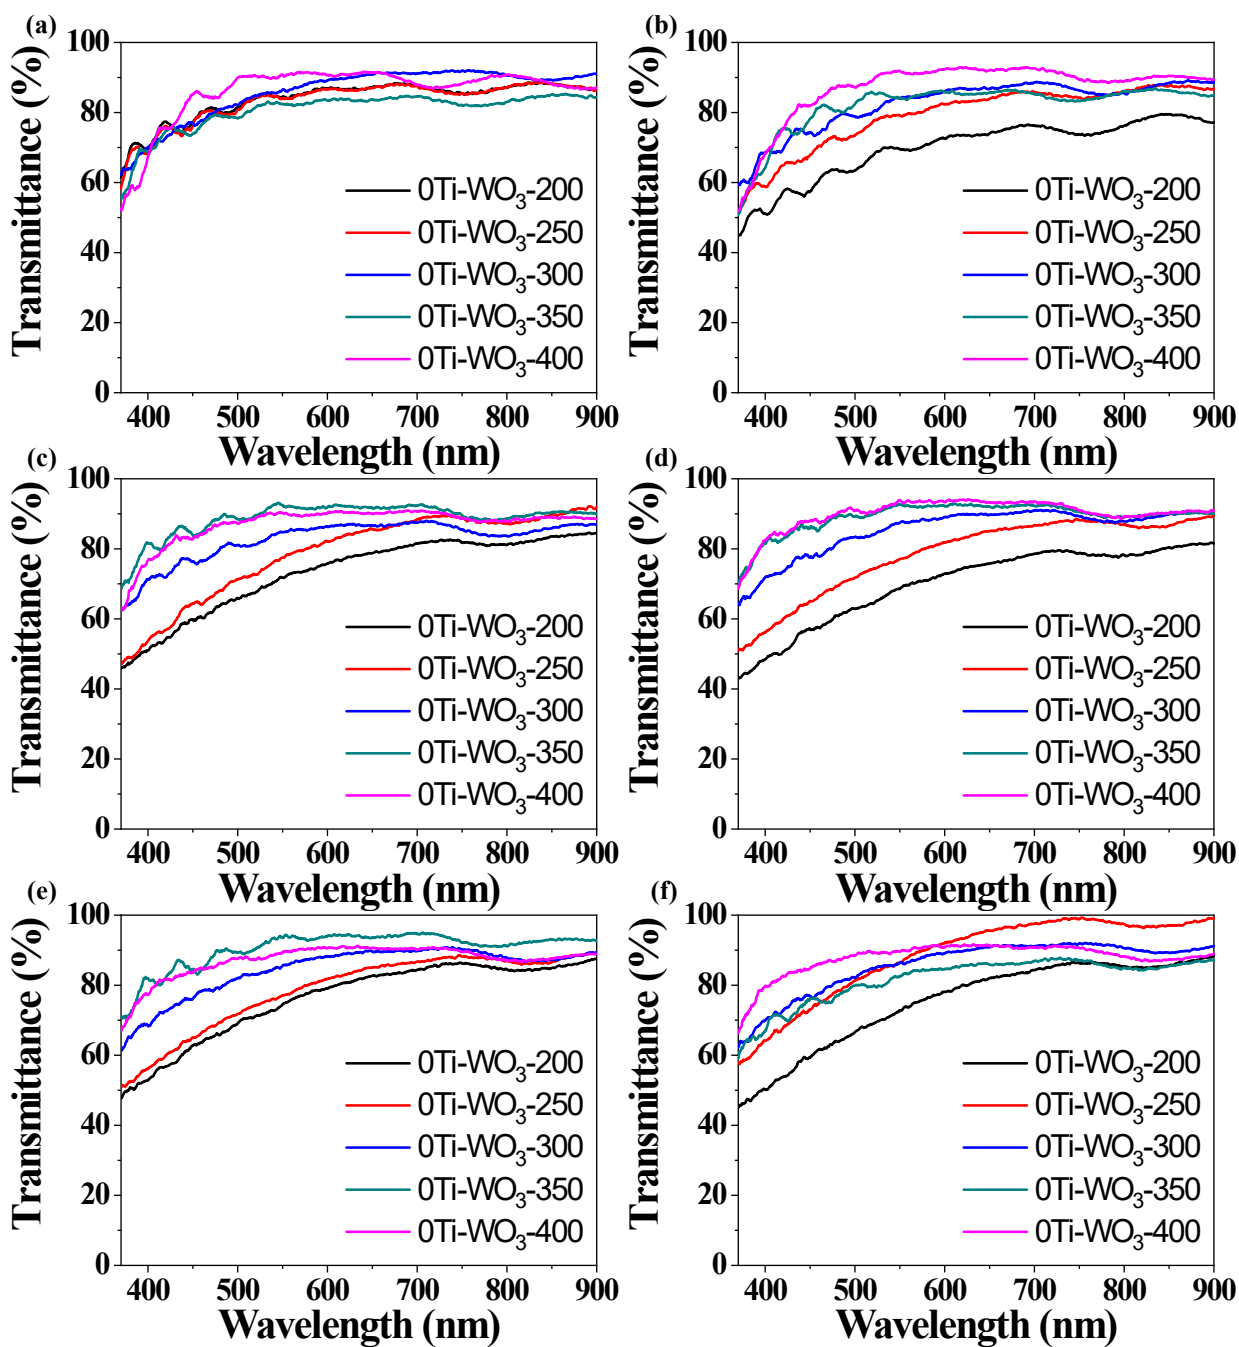

**Figure S11.** UV-Visible transmittance spectra of (a) 0Ti-WO<sub>3</sub>, (b) 4Ti-WO<sub>3</sub>, (c) 8Ti-WO<sub>3</sub>, (d) 12Ti-WO<sub>3</sub>, (e) 16Ti-WO<sub>3</sub>, and (f) 20Ti-WO<sub>3</sub> at the pristine states under different annealing temperatures.

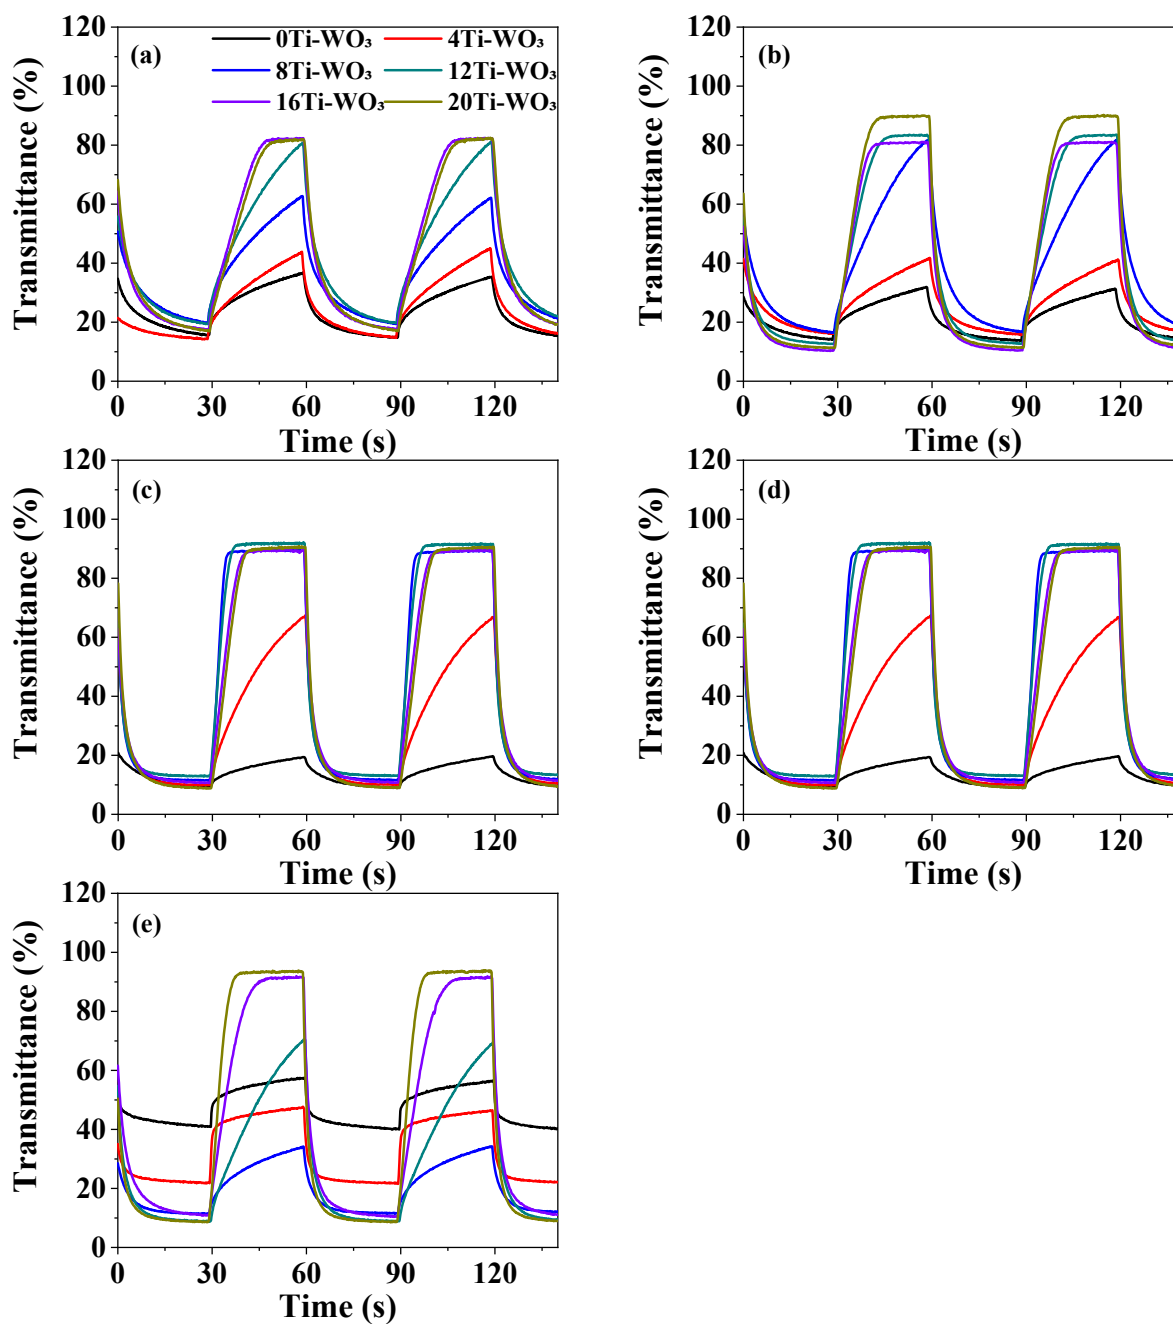

**Figure S12.** *In situ* optical response of the WO<sub>3</sub> films for 60 s per step measured at 550 nm annealed at (a) 200, (b) 250, (c) 300, (d) 350, and (e) 400 °C.

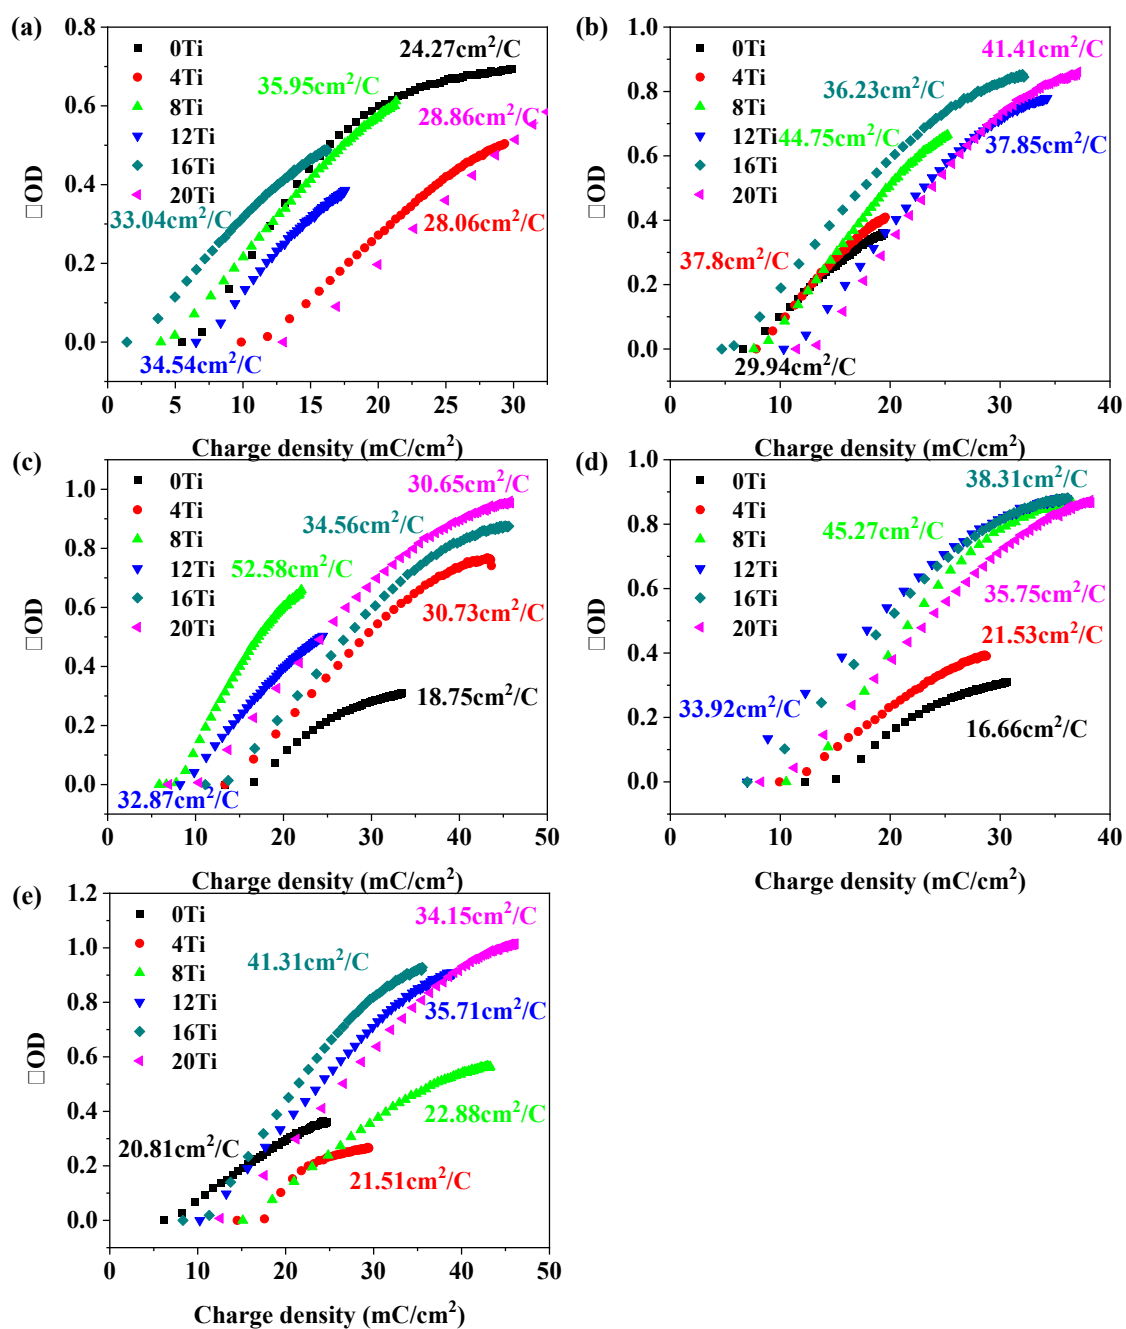

**Figure S13.** Optical density variation with respect to the charge density of  $\text{WO}_3$  films annealed at (a) 200, (b) 250, (c) 300, (d) 350, and (e) 400 °C.

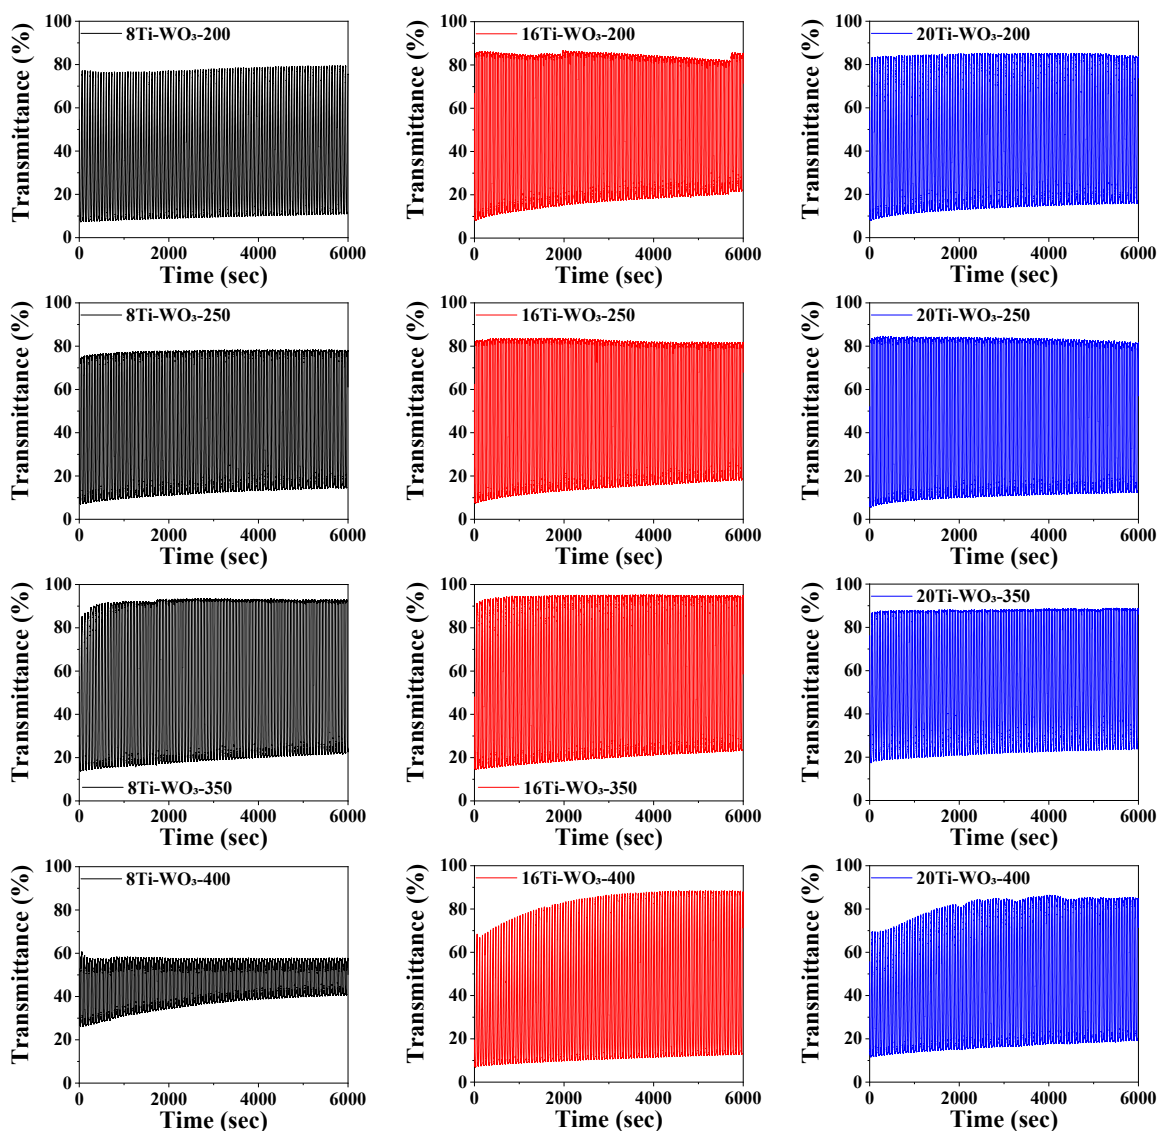

**Figure S14.** In-situ transmittance variation at  $\lambda=550$  nm during cyclic tests for 8Ti-, 16Ti- and 20Ti-WO<sub>3</sub>-films from left to right annealed at 200 (1<sup>st</sup> row), 250 (2<sup>nd</sup> row), 350 (3<sup>rd</sup> row) and 400 °C (4<sup>th</sup> row).
